# Supplementary material
Source: publisher site journal article supplement (http://www.dovepress.com/get_supplementary_file.php?f=243657.docx)
Supplement: Supplementary file 1 [file get_supplementary_file.php]

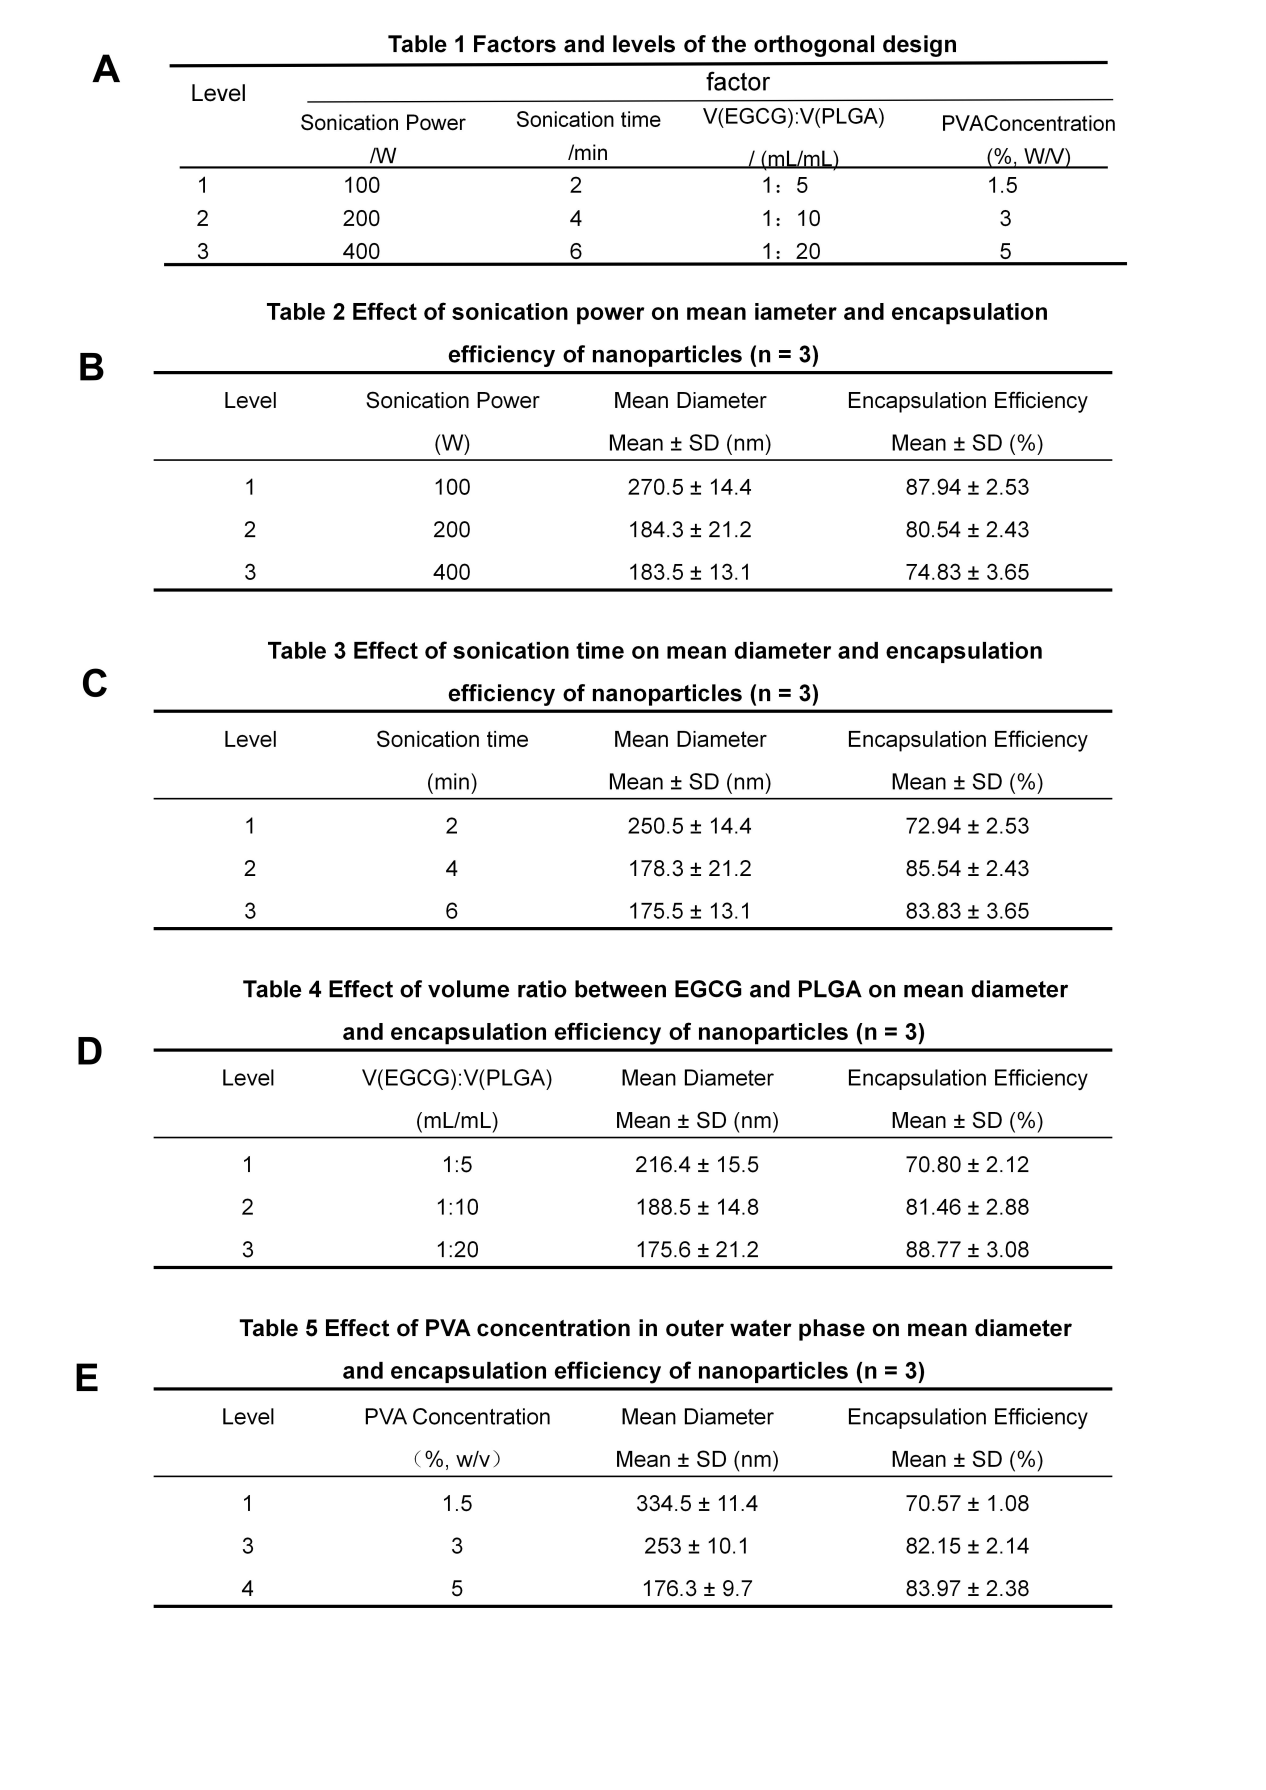


**Supplementary Figure S1**： Effect of various processing parameters on mean particle size and EE% . The factors and levels of the orthogonal design are listed in the table **(A)**. **(B)** sonication power. **(C)** sonication time. **(D)** volume ratio between EGCG and PLGA. **(E)** PVA concentration.
